# Supplementary material for: Prospective Evaluation of Mango Fruit Intake on Facial Wrinkles and Erythema in Postmenopausal Women: A Randomized Clinical Pilot Study
Source: MDPI journal article supplement (doi:10.3390/nu12113381), 2020-11-04
Supplement: s1 [file s1]

## Supplementary

Table S1. 24-hour reported dietary intake.

|                                        | 85g group (n = 16) |              |             | <i>p</i><br>vs 0 | <i>p</i><br>vs 0 | 250g group (n = 16) |               |             | <i>p</i><br>vs 0 | <i>p</i><br>vs 0 | Between groups     |                     |                    |                    |                     |
|----------------------------------------|--------------------|--------------|-------------|------------------|------------------|---------------------|---------------|-------------|------------------|------------------|--------------------|---------------------|--------------------|--------------------|---------------------|
|                                        | Week 0             | Week 8       | Week 16     |                  |                  | Week 0              | Week 8        | Week 16     |                  |                  | <i>p</i><br>Week 8 | <i>p</i><br>Week 16 | <i>p</i><br>Week 0 | <i>p</i><br>Week 8 | <i>p</i><br>Week 16 |
|                                        | Mean ± SD          | Mean ± SD    | Mean ± SD   |                  |                  | Mean ± SD           | Mean ± SD     | Mean ± SD   |                  |                  | Mean ± SD          | Mean ± SD           | Mean ± SD          | Mean ± SD          | Mean ± SD           |
| Energy (kcal)                          | 1698 ± 555         | 1865 ± 575   | 1904 ± 801  | 0.21             | 0.37             | 1713 ± 440          | 2037 ± 549    | 1820 ± 827  | 0.12             | 0.75             | 0.76               | 0.93                | 0.21               |                    |                     |
| Protein (g)                            | 70 ± 37            | 83 ± 30      | 79 ± 30     | 0.09             | 0.29             | 74 ± 42             | 84 ± 33       | 69 ± 39     | 0.3              | 0.16             | 0.71               | 0.83                | 0.08               |                    |                     |
| Total Fat (g)                          | 70 ± 35            | 75 ± 35      | 90 ± 51     | 0.48             | 0.26             | 76 ± 25             | 95 ± 25       | 77 ± 50     | 0.21             | 0.17             | 0.69               | 0.37                | 0.07               |                    |                     |
| Carbohydrates (g)                      | 201 ± 45           | 208 ± 85     | 194 ± 81    | 0.81             | 0.58             | 180 ± 56            | 214 ± 71      | 220 ± 89    | 0.09             | 0.06             | 0.06               | 0.39                | 0.86               |                    |                     |
| Sugars, total (g)                      | 90 ± 30            | 111 ± 56     | 74 ± 38     | 0.22             | 0.13             | 78 ± 31             | 97 ± 31       | 107 ± 51    | 0.04*            | 0.01*            | 0.06               | 0.25                | 0.15               |                    |                     |
| Fiber, total dietary (g)               | 26 ± 18            | 20 ± 7       | 22 ± 8      | 0.68             | 0.79             | 18 ± 6              | 26 ± 11       | 24 ± 11     | 0.03             | 0.13             | 0.02*              | 0.87                | 0.41               |                    |                     |
| Potassium (mg)                         | 2667 ± 770         | 3183 ± 1182  | 2718 ± 857  | 0.01*            | 0.99             | 2441 ± 846          | 3233 ± 746    | 3074 ± 1267 | 0.008*           | 0.049*           | 0.17               | 0.2                 | 0.8                |                    |                     |
| Vitamin C (mg)                         | 99 ± 77            | 201 ± 276    | 171 ± 293   | 0.15             | 0.7              | 88 ± 67             | 140 ± 79      | 135 ± 97    | 0.02*            | 0.15             | 0.23               | 0.64                | 0.78               |                    |                     |
| Folate, total (mcg)                    | 401 ± 147          | 419 ± 243    | 466 ± 177   | 0.85             | 0.4              | 316 ± 118           | 467 ± 205     | 439 ± 171   | 0.005*           | 0.03*            | 0.02*              | 0.96                | 0.24               |                    |                     |
| Vitamin A, RAE (mcg_RAE)               | 826 ± 438          | 996 ± 741    | 1046 ± 641  | 0.59             | 0.8              | 673 ± 362           | 1483 ± 1401   | 806 ± 540   | 0.04             | 0.69             | 0.29               | 0.63                | 0.36               |                    |                     |
| Retinol (mcg)                          | 315 ± 216          | 373 ± 206    | 397 ± 235   | 0.38             | 0.18             | 327 ± 122           | 386 ± 227     | 373 ± 265   | 0.59             | 0.48             | 0.51               | 0.74                | 0.2                |                    |                     |
| Carotene, beta (mcg)                   | 5614 ± 5746        | 6957 ± 8452  | 6935 ± 5539 | 0.61             | 0.89             | 3504 ± 3594         | 11154 ± 14647 | 4865 ± 6507 | 0.01             | 0.52             | 0.11               | 0.93                | 0.24               |                    |                     |
| Carotene, alpha (mcg)                  | 619 ± 740          | 935 ± 1149   | 1584 ± 2010 | 0.24             | 0.16             | 893 ± 1511          | 2661 ± 6638   | 496 ± 1143  | 0.24             | 0.38             | 0.56               | 0.53                | 0.12               |                    |                     |
| Lutein + zeaxanthin (mcg)              | 5692 ± 8191        | 6934 ± 11437 | 5785 ± 6129 | 0.71             | 0.69             | 2289 ± 2418         | 5846 ± 12381  | 4000 ± 5678 | 0.61             | 0.74             | 0.03*              | 0.17                | 0.13               |                    |                     |
| Vitamin E, alpha-tocopherol (mg)       | 10.8 ± 7           | 10.2 ± 4.5   | 11.2 ± 5.3  | 0.6              | 0.93             | 9.5 ± 3.8           | 17.4 ± 10.4   | 13.4 ± 10.1 | 0.008            | 0.27             | 0.23               | 0.44                | 0.88               |                    |                     |
| Cholesterol (mg)                       | 314 ± 283          | 330 ± 211    | 414 ± 276   | 0.51             | 0.04*            | 282 ± 218           | 264 ± 163     | 212 ± 193   | 0.82             | 0.046*           | 0.29               | 0.77                | 0.01*              |                    |                     |
| Fatty acids, total saturated (g)       | 19 ± 12            | 22 ± 12      | 27 ± 22     | 0.38             | 0.29             | 25 ± 9              | 27 ± 9        | 23 ± 15     | 0.53             | 0.07             | 0.15               | 0.22                | 0.28               |                    |                     |
| Fatty acids, total monounsaturated (g) | 26 ± 14            | 27 ± 12      | 34 ± 18     | 0.45             | 0.25             | 26 ± 11             | 36 ± 11       | 29 ± 21     | 0.08             | 0.5              | 0.91               | 0.43                | 0.08               |                    |                     |
| Fatty acids, total polyunsaturated (g) | 20 ± 9             | 19.5 ± 10.7  | 23 ± 10     | 0.96             | 0.49             | 20 ± 8.5            | 26 ± 12       | 19 ± 13     | 0.34             | 0.17             | 0.68               | 0.59                | 0.02*              |                    |                     |

\*Significant at the  $p < 0.05$  level. Analyzed with Two Way ANCOVA and BMI as a covariate.
